# Supplementary material for: Non-cytotoxic, temperature-responsive and antibacterial POEGMA based nanocomposite coatings with silver nanoparticles
Source: Royal Society of Chemistry journal article supplement (doi:10.1039/c9ra10874b), 2020-01-01
Supplement: c9ra10874b1.pdf [file c9ra10874b1.pdf]

**Non-cytotoxic, temperature-responsive and antibacterial POEGMA based nanocomposite coatings with silver nanoparticles**

*Svyatoslav Nastyshyn<sup>1</sup>, Joanna Raczkowska<sup>1\*</sup>, Yuriy Stetsyshyn<sup>2\*</sup>, Barbara Orzechowska<sup>3</sup>, Andrzej Bernasik<sup>4</sup>, Yana Shymborska<sup>2</sup>, Monika Brzywczy-Włoch<sup>5</sup>, Tomasz Gosiewski<sup>5</sup>, Ostap Lishchynskiy<sup>2</sup>, Halyna Ohar<sup>2</sup>, Dorota Ochońska<sup>5</sup>, Kamil Awiuk<sup>1</sup>, Andrzej Budkowski<sup>1</sup>*

<sup>1</sup>Smoluchowski Institute of Physics, Jagiellonian University, Łojasiewicza 11, 30-348 Kraków, Poland

<sup>2</sup>Lviv Polytechnic National University, St. George's Square 2, 79013 Lviv, Ukraine

<sup>3</sup>Institute of Nuclear Physics Polish Academy of Sciences, Radzikowskiego 152, 31-342 Kraków, Poland

<sup>4</sup>Faculty of Physics and Applied Computer Science, Academic Centre for Materials and Nanotechnology, AGH University of Science and Technology, Al. Mickiewicza 30, 30-049 Kraków, Poland

<sup>5</sup>Chair of Microbiology, Department of Molecular Medical Microbiology, Faculty of Medicine, Jagiellonian University Medical College, Czysza 18, 31-121 Kraków, Poland

---

\*Corresponding authors E-mail: Yuriy Stetsyshyn [yrstecushun@ukr.net](mailto:yrstecushun@ukr.net), Joanna Raczkowska [joanna.raczkowska@uj.edu.pl](mailto:joanna.raczkowska@uj.edu.pl)

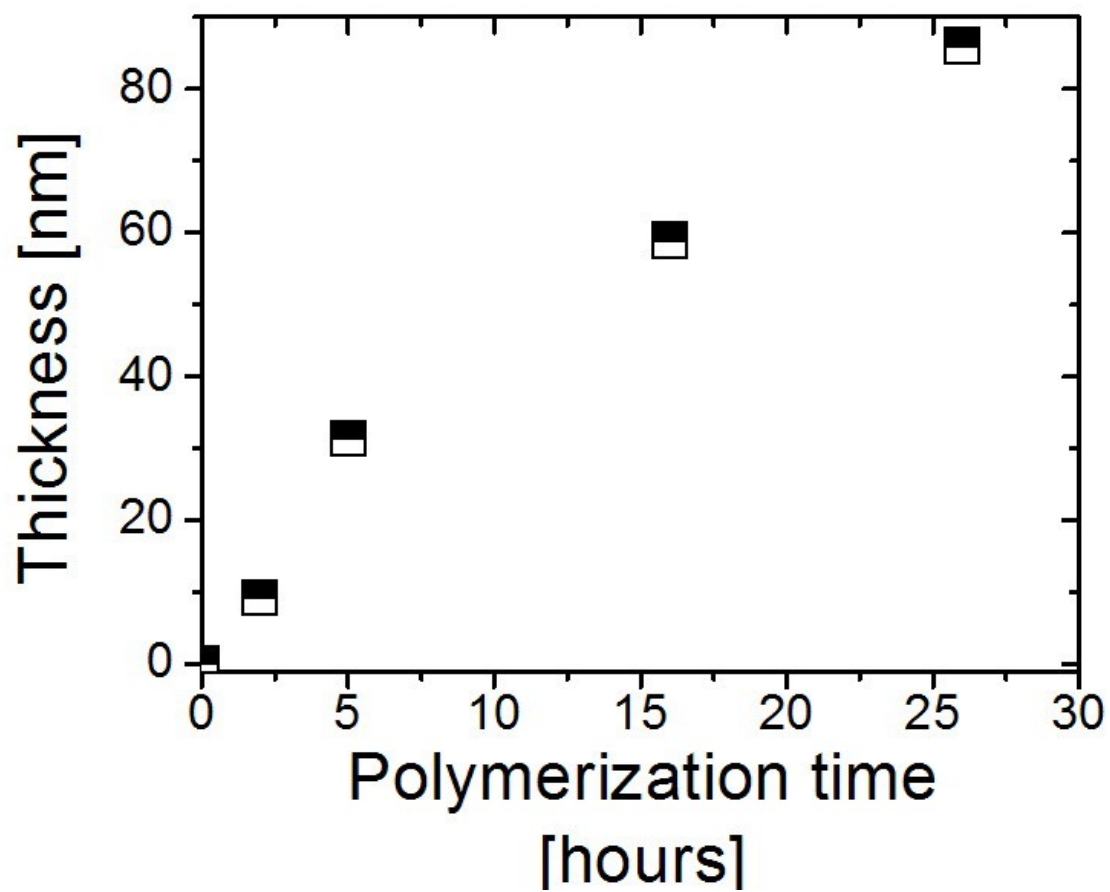

**Figure S1.** Thickness of grafted POEGMA188 brush coatings versus polymerization time.

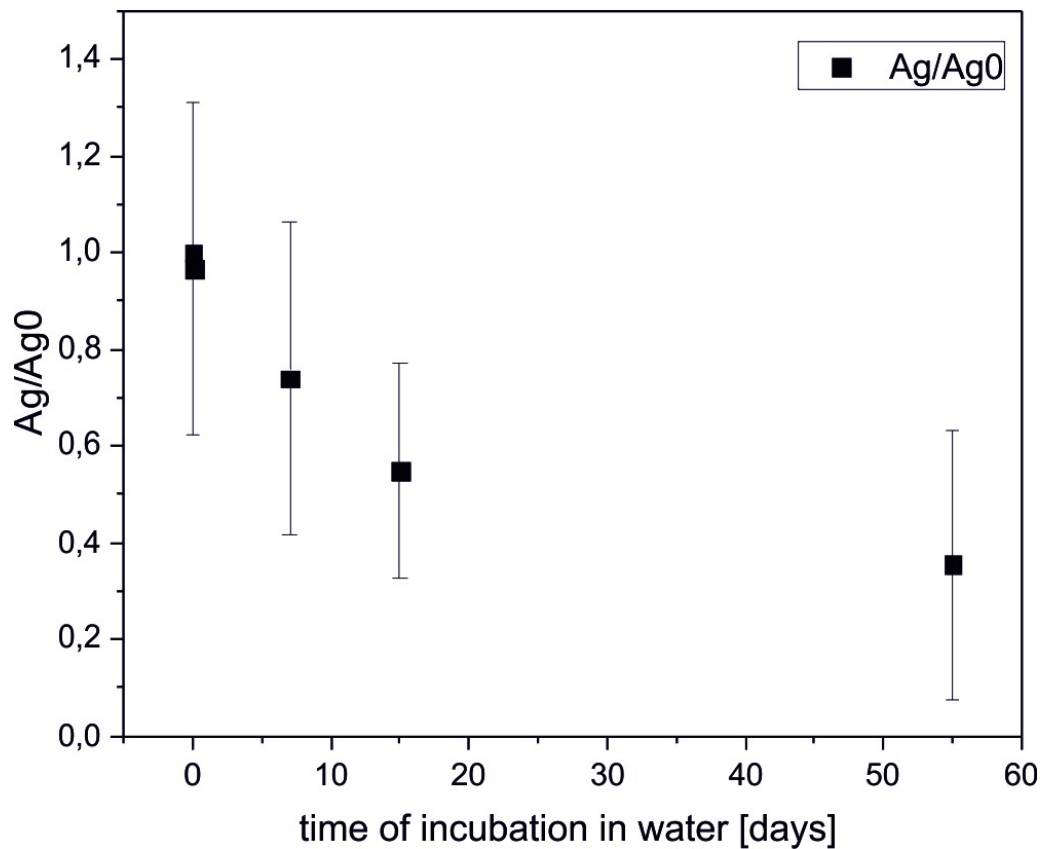

**Figure S2.** Silver release from POEGMA188 grafted brushes nanocomposite coatings fabricated by 16 hours of polymerization with AgNPs incorporated after 15 min of immersion at 5 mM AgNO<sub>3</sub> solution followed by reduction in 0.2 M NaBH<sub>4</sub> solution for 12 h.
